# Supplementary material
Source: publisher figshare collection journal article supplement (https://gsapubs.figshare.com/ndownloader/files/23297054)
Supplement: Supplementary file 1 [file 23297054]

Figure DR1 - Uninterpreted large-format versions of seismic sections shown in Fig. 2

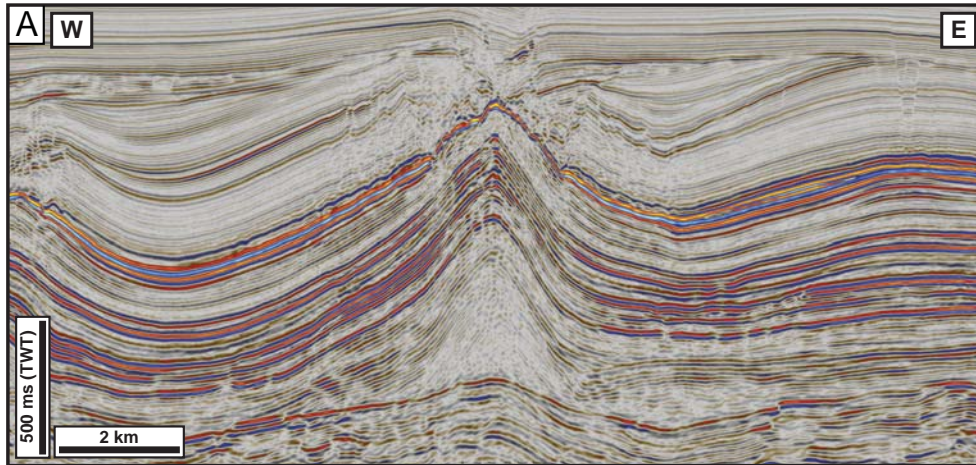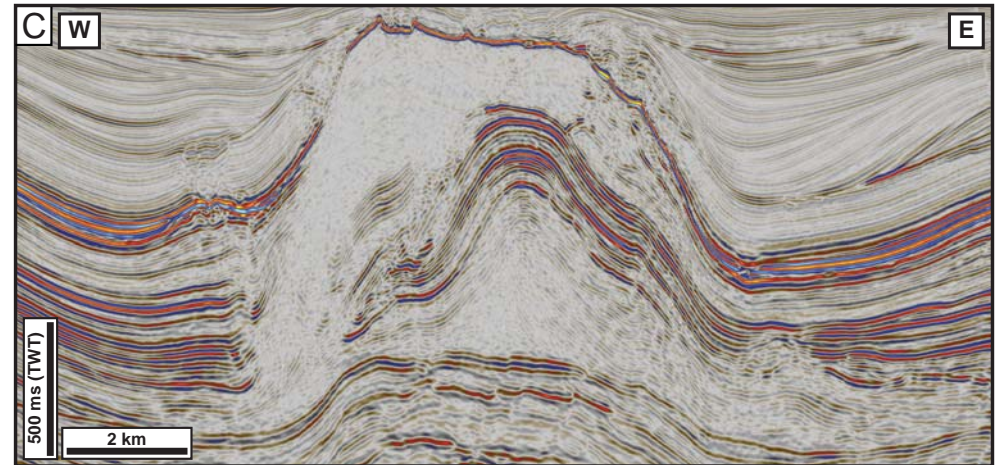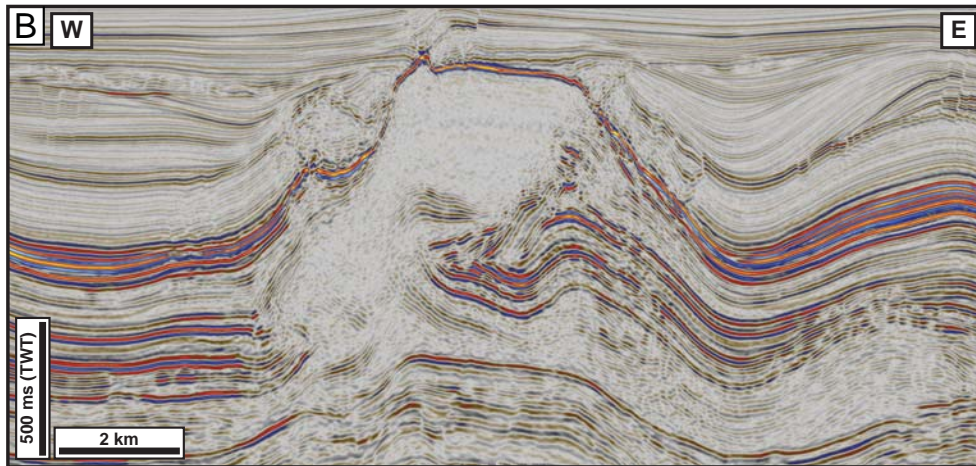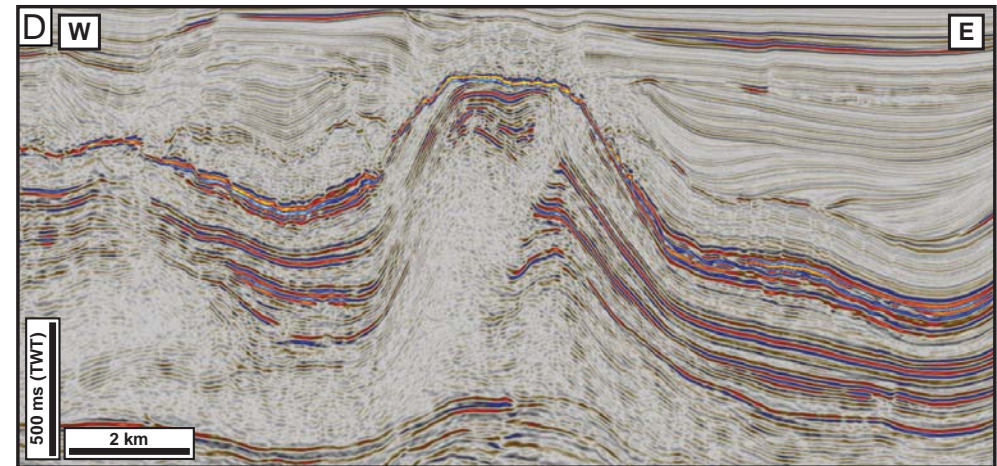



Figure DR2 - Uninterpreted large-format version of seismic section shown in Fig. 3

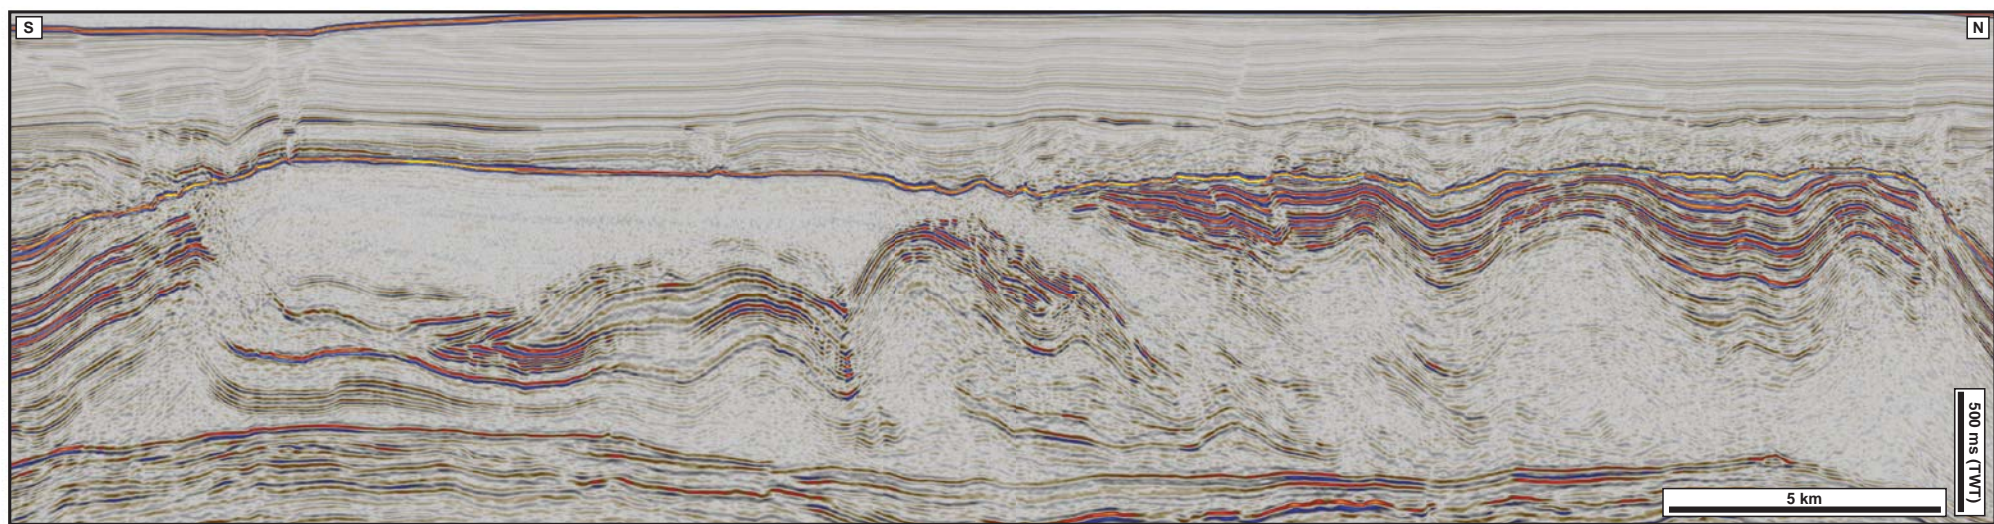

Table DR1. Physical and seismic characteristics of the Aptian evaporite-dominated unit in the Santos Basin

| <i>Stratigraphic Unit</i> | <i>Thickness (m)</i> | <i>Halite content (%)</i> | <i>Mean Density (kg m<sup>3</sup>)</i> | <i>Aggregated Density (kg m<sup>3</sup>)</i> | <i>Seismic expression*</i>                                   | <i>Comments</i>                                                                   |
|---------------------------|----------------------|---------------------------|----------------------------------------|----------------------------------------------|--------------------------------------------------------------|-----------------------------------------------------------------------------------|
|                           |                      |                           |                                        |                                              |                                                              |                                                                                   |
| A1                        | 335-1170             | 80-98                     | 2137                                   | 2.14                                         | chaotic, low-amplitude reflections                           | Mobile unit; highly variable thickness due to post-depositional flow              |
| A2                        | 465-825              | 68-86                     | 2144                                   | 2.26                                         | parallel, continuous, high-amplitude reflections             | Contains thick (50-235 m), dense (2150-2244 km m <sup>3</sup> ), anhydrite layers |
| A3                        | 265-345              | 70-93                     | 2105                                   |                                              | parallel, continuous, low-to-moderate amplitiude reflections | Fairly uniform thickness across study area                                        |
| A4                        | 0-260                | 30-86                     | 2258                                   |                                              | parallel, continuous, very high-amplitude reflections        | Relatively thin but very high density; locally eroded from salt structure crests  |

\*see Figs 2 and 3
